# Supplementary material for: Effects of Dietary n-3 LCPUFA Supplementation on the Hippocampus of Aging Female Mice: Impact on Memory, Lipid Raft-Associated Glutamatergic Receptors and Neuroinflammation
Source: MDPI journal article supplement (doi:10.3390/ijms23137430), 2022-07-04

Flotillin-1

6 months

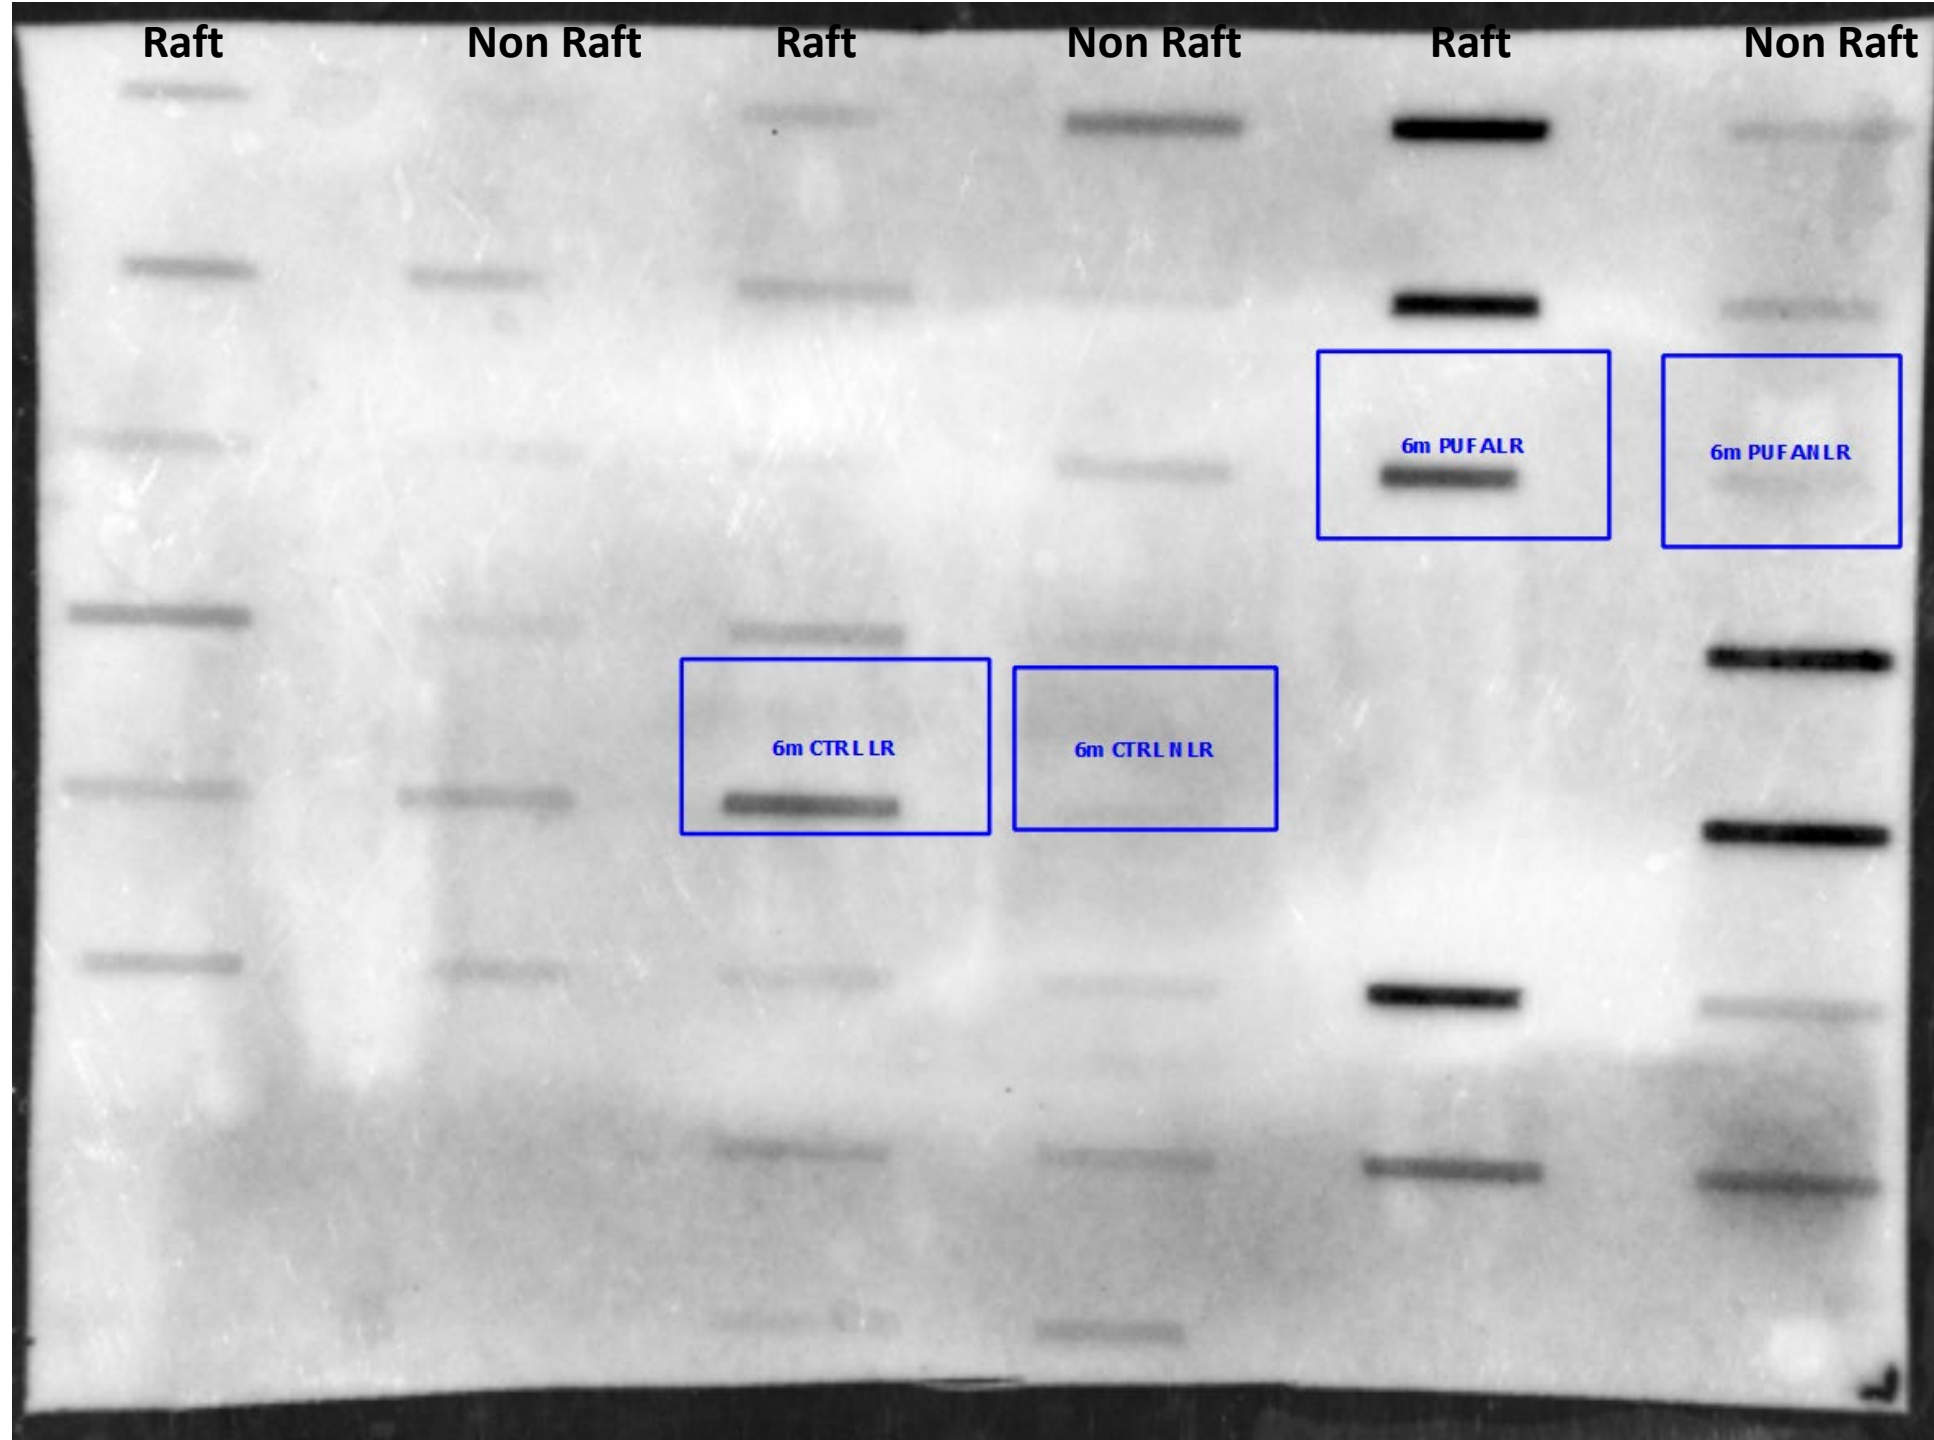

\*Nomenclature

LR = Raft

NLR = Non Raft

Flotilin-1

15 months

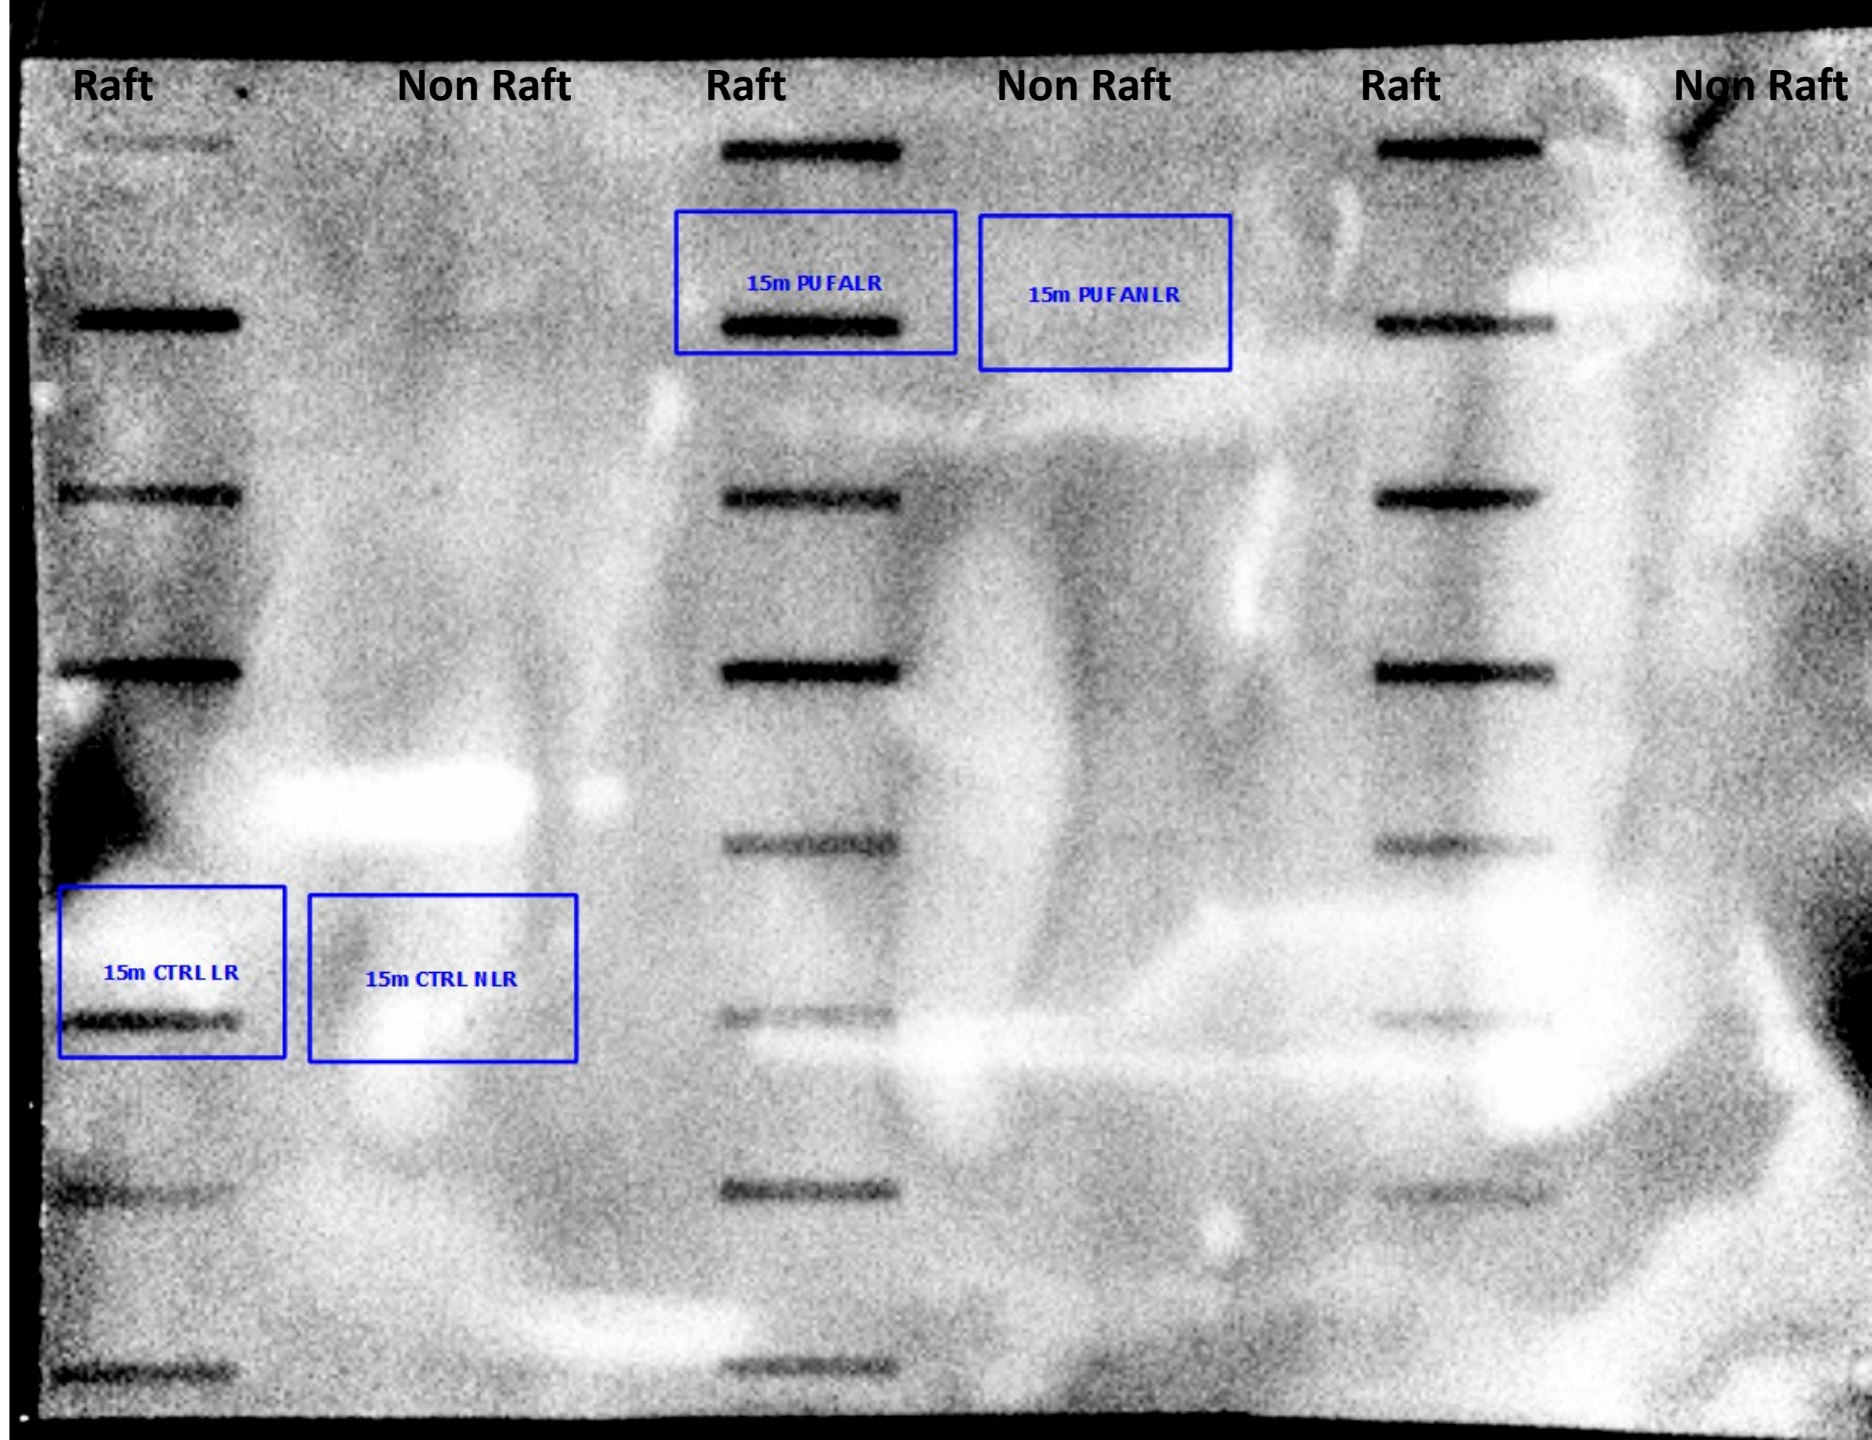

mGluR5

6 and 15 months

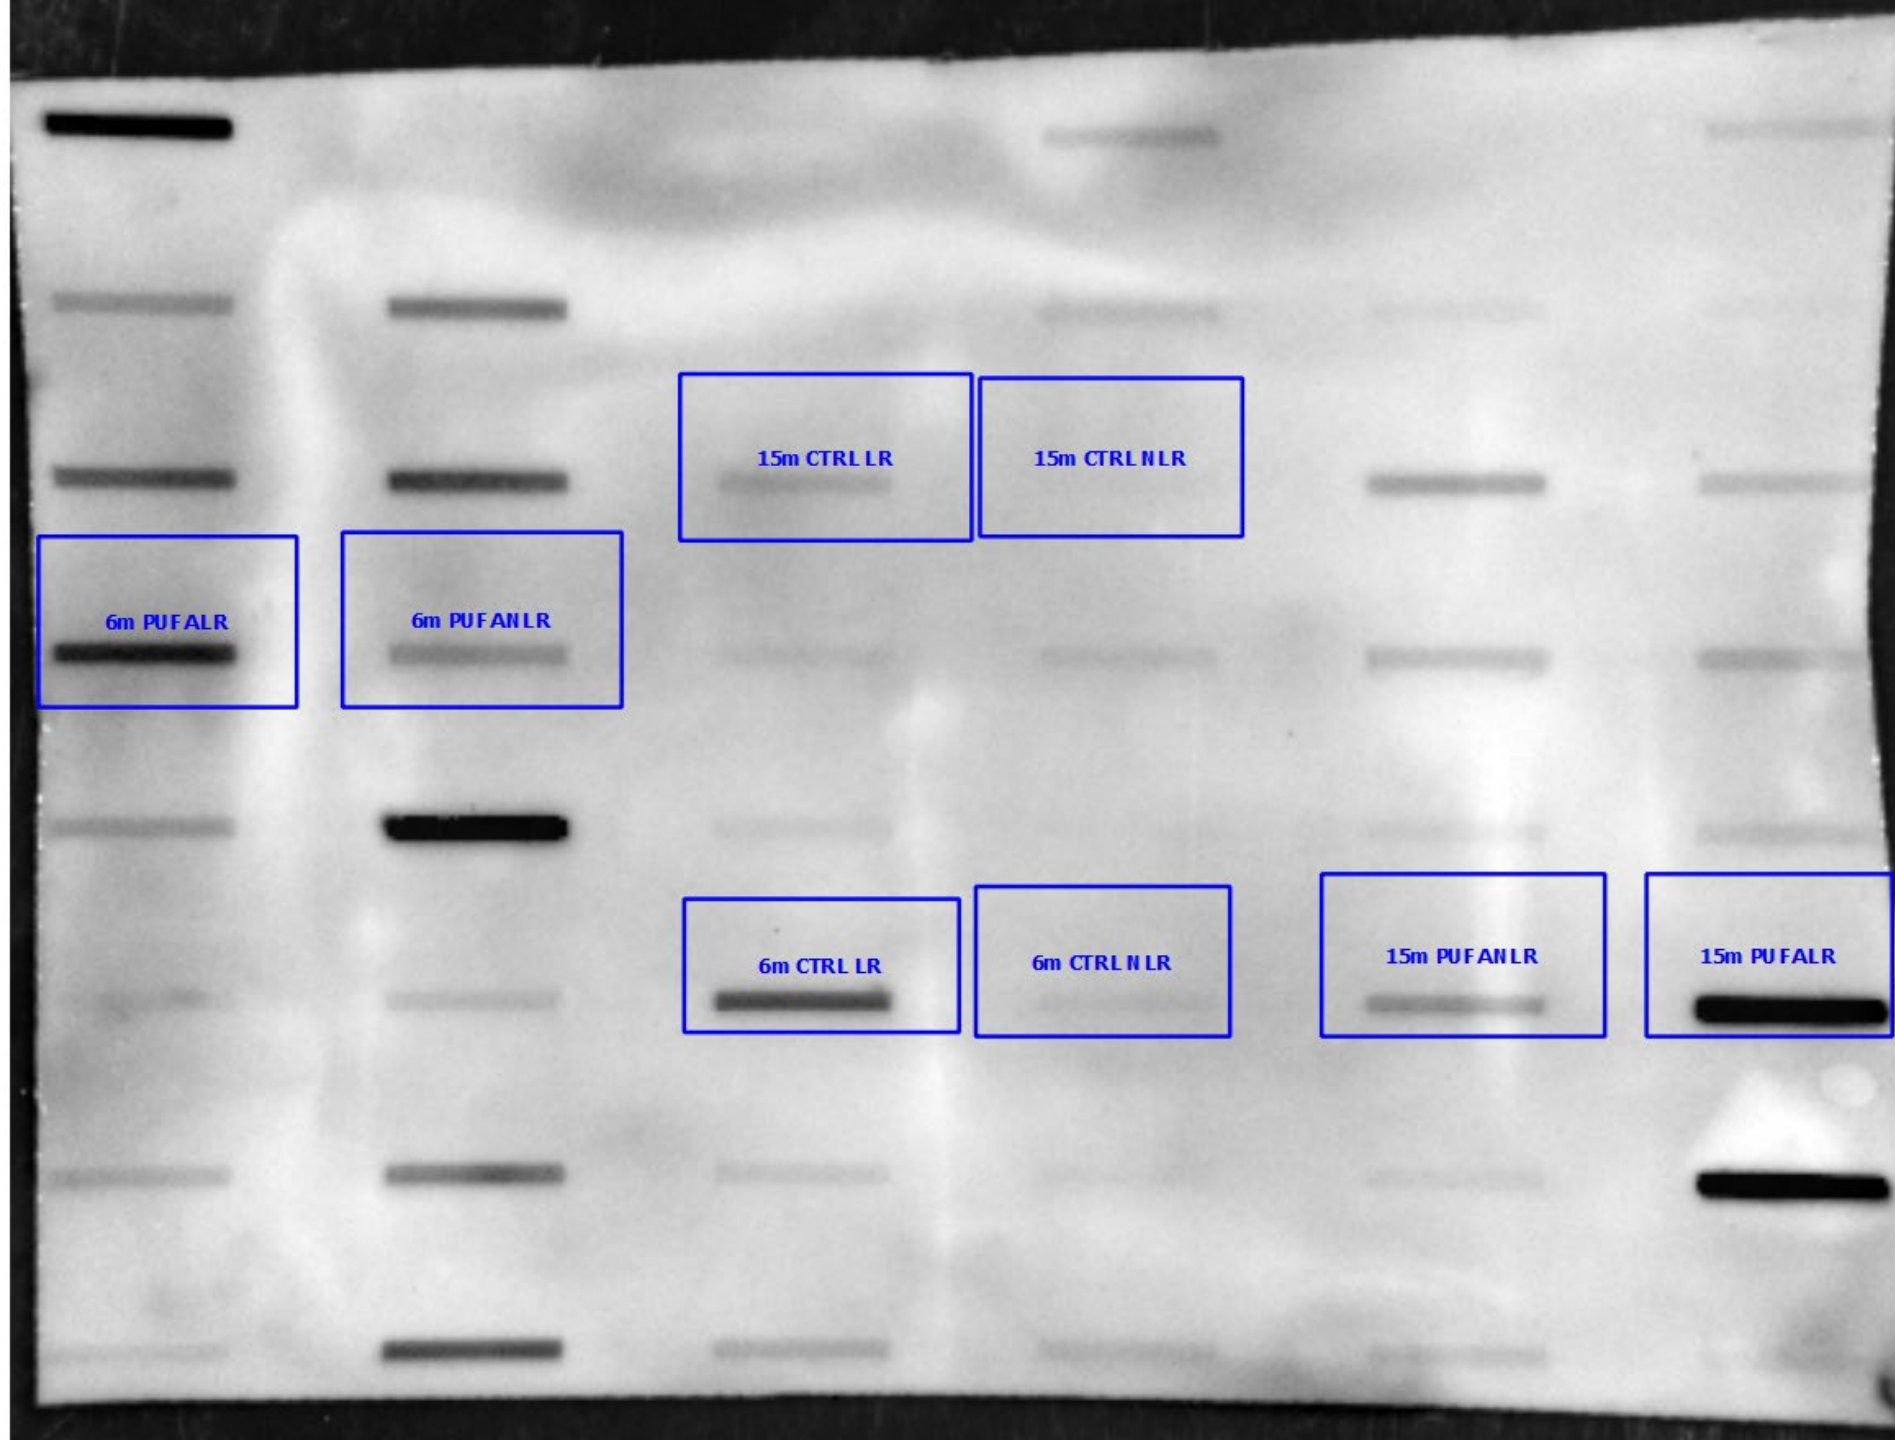



GluN2B

6 and 15 months

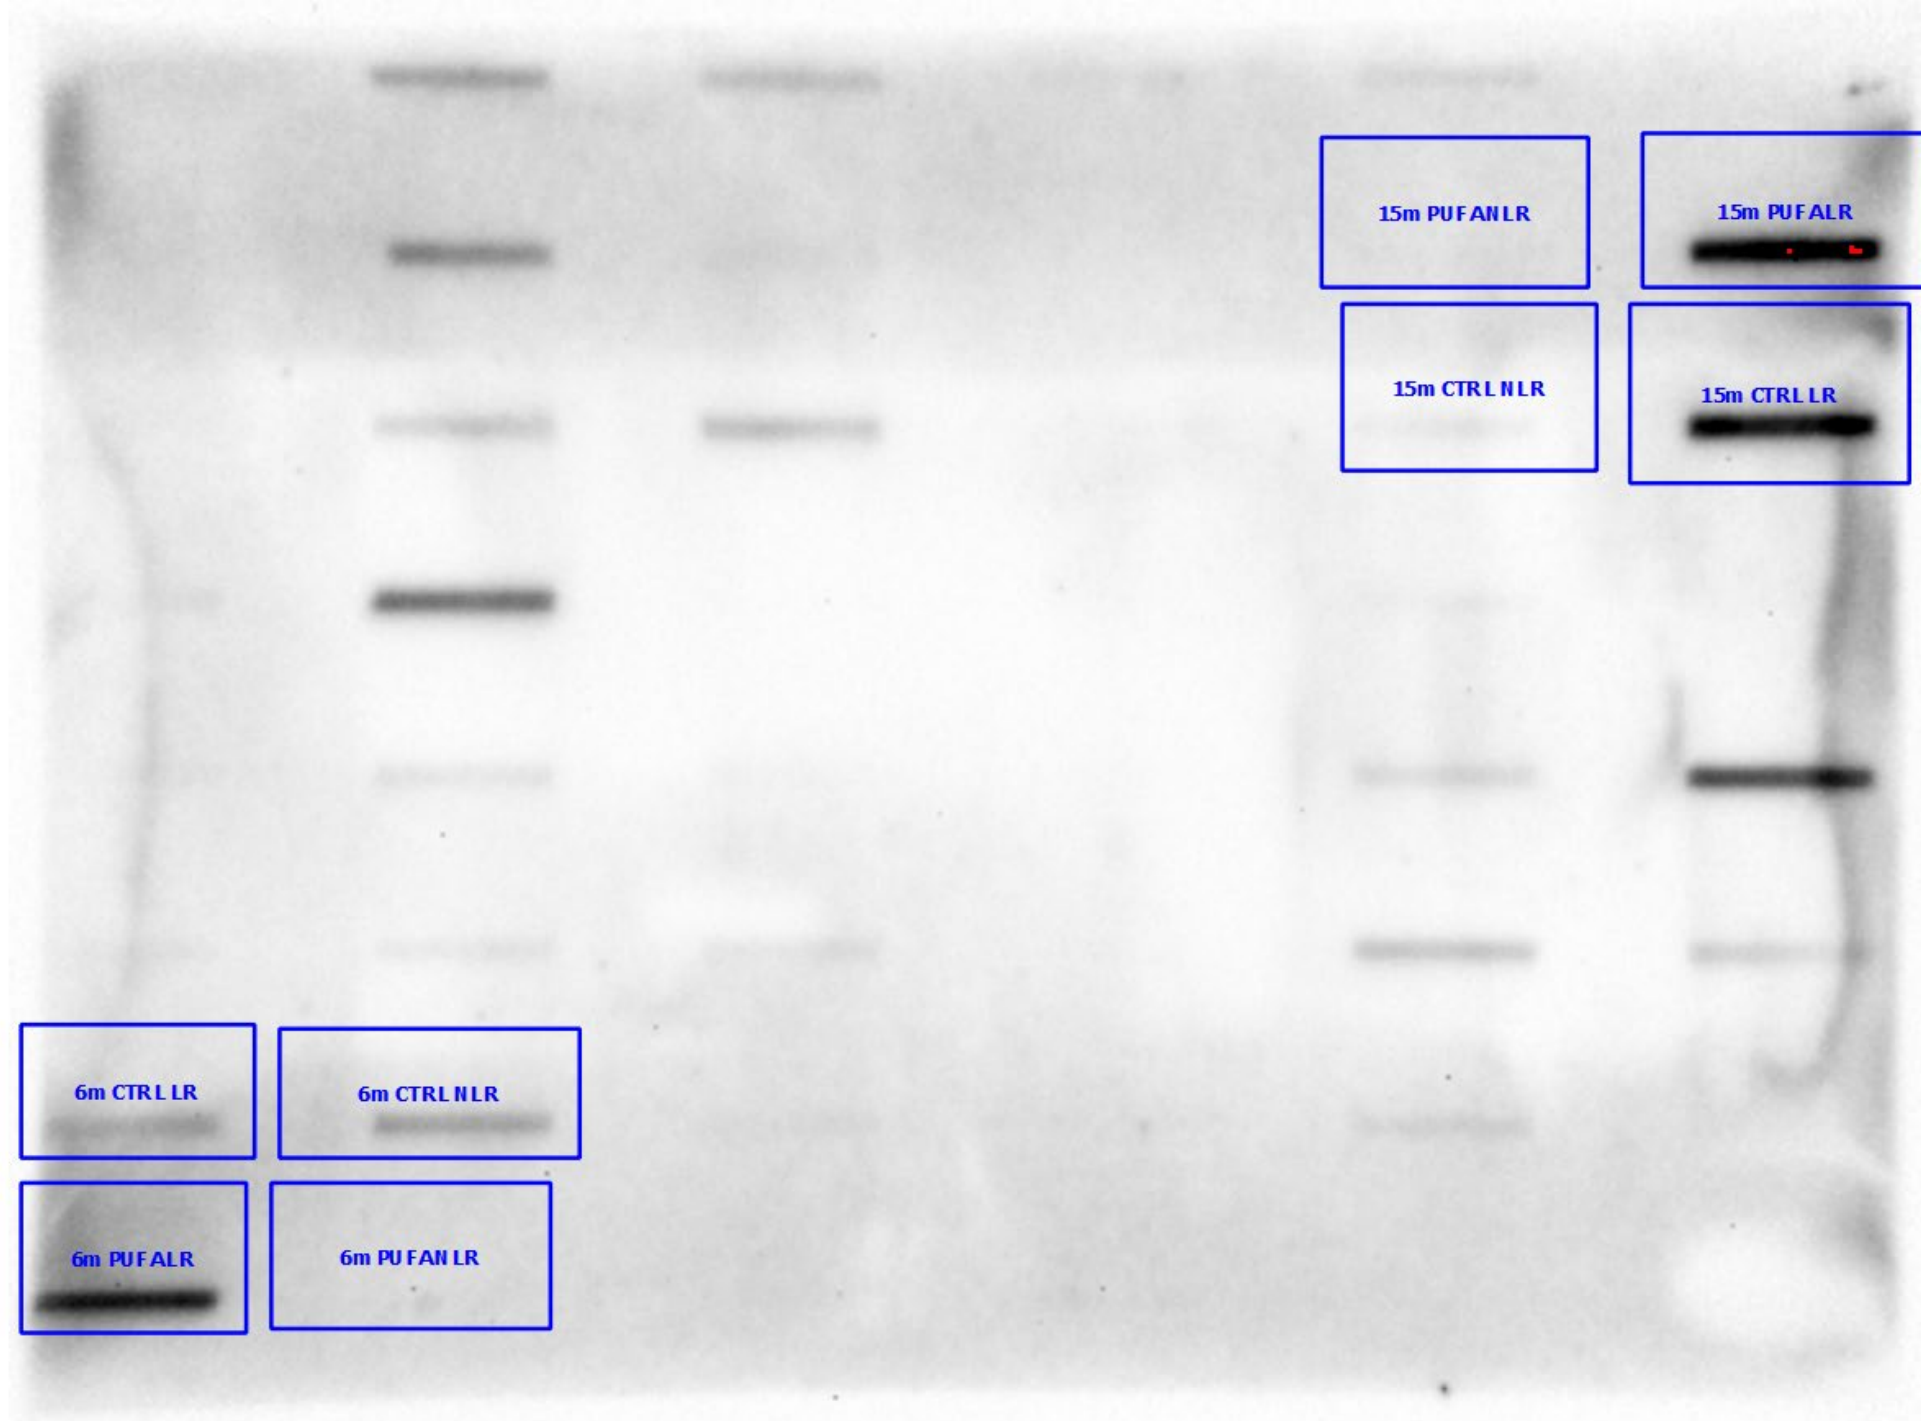

GluA1

6 and 15 months

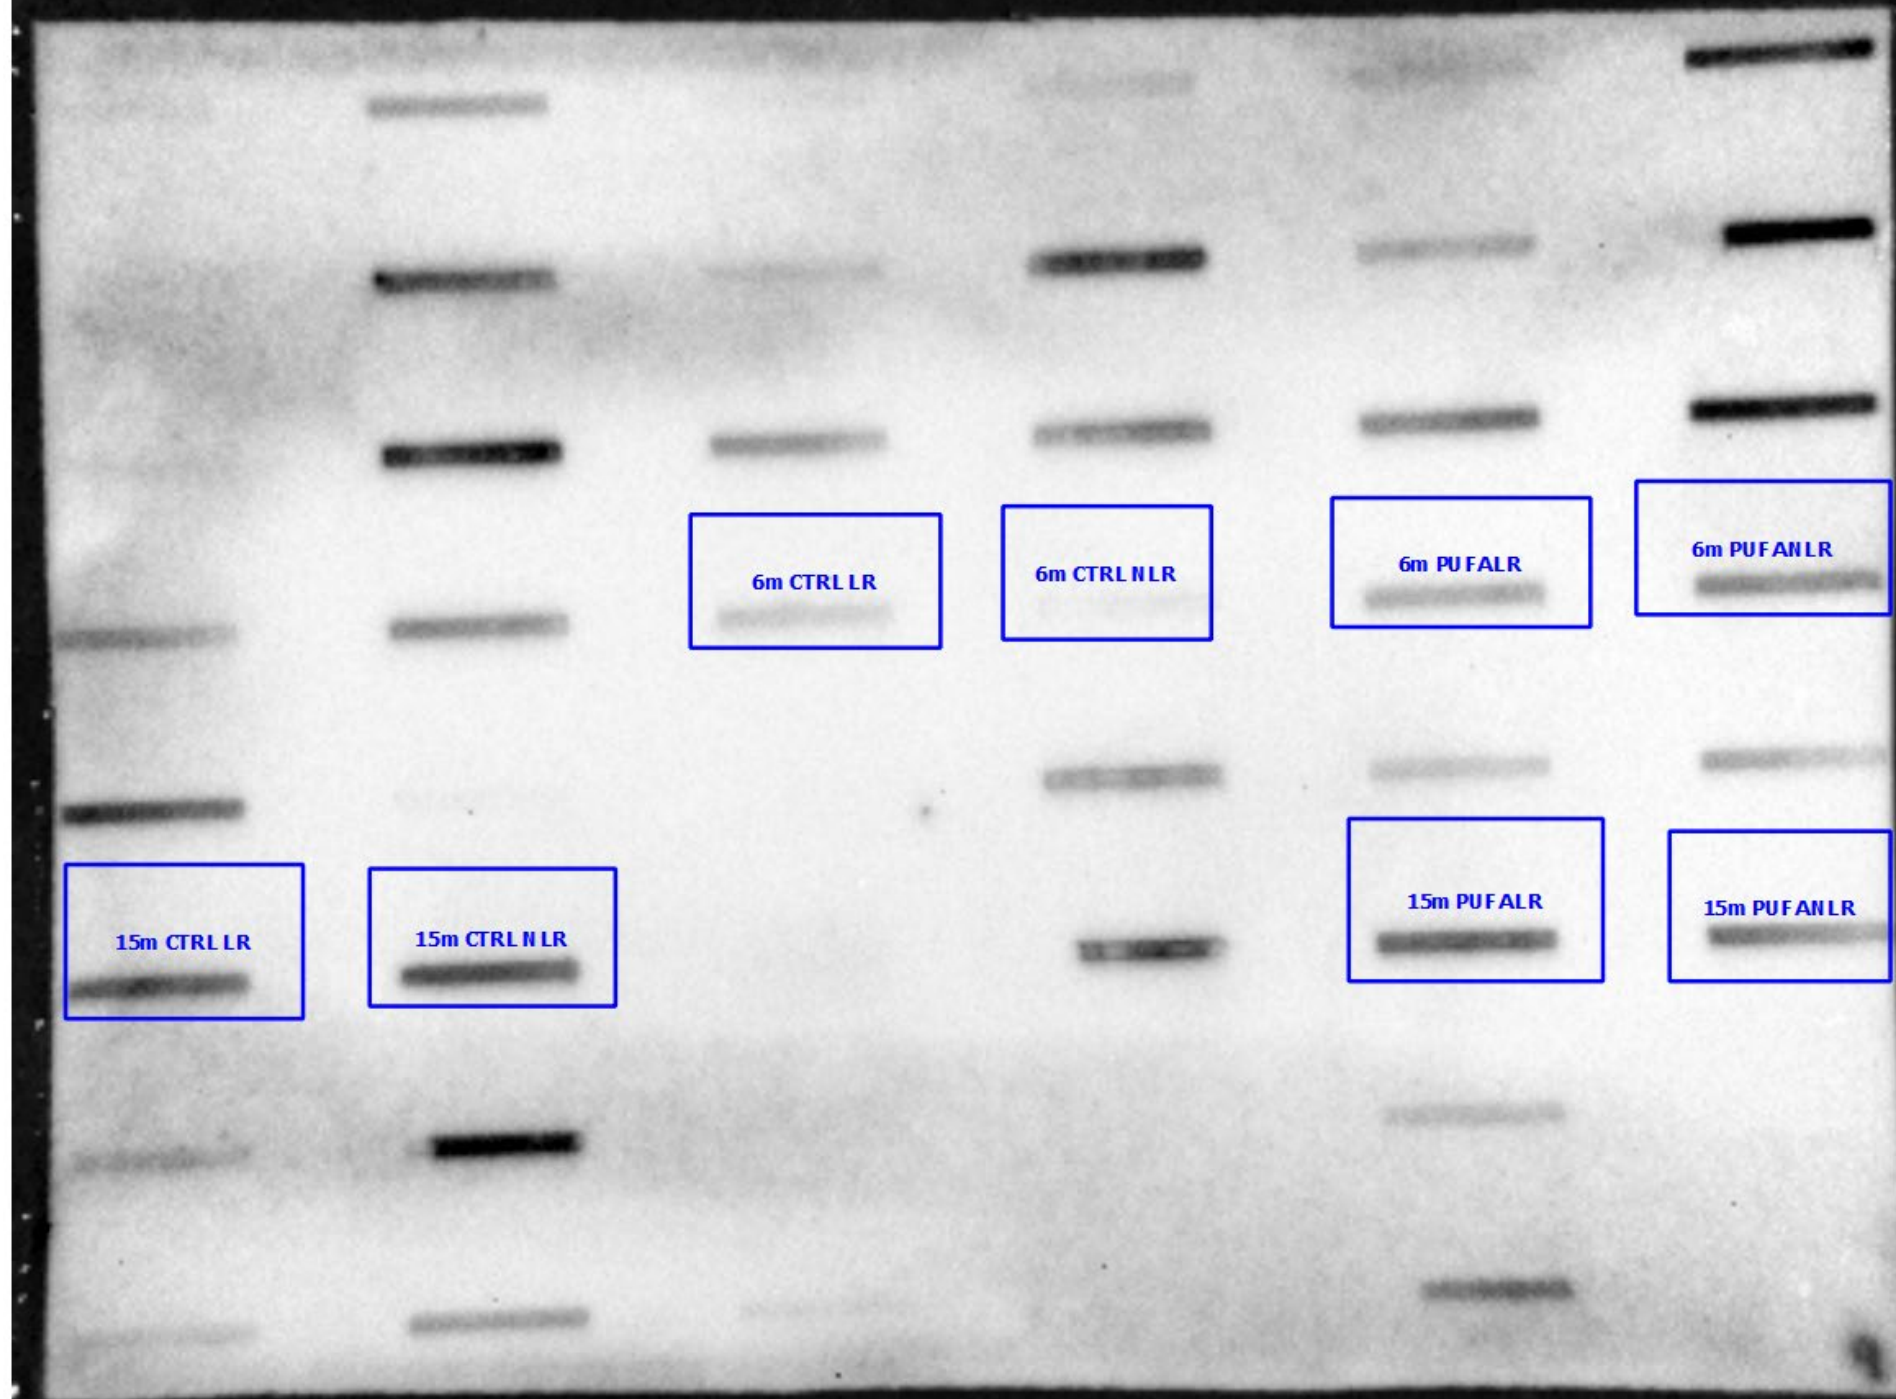

ERalpha

6 and 15 months

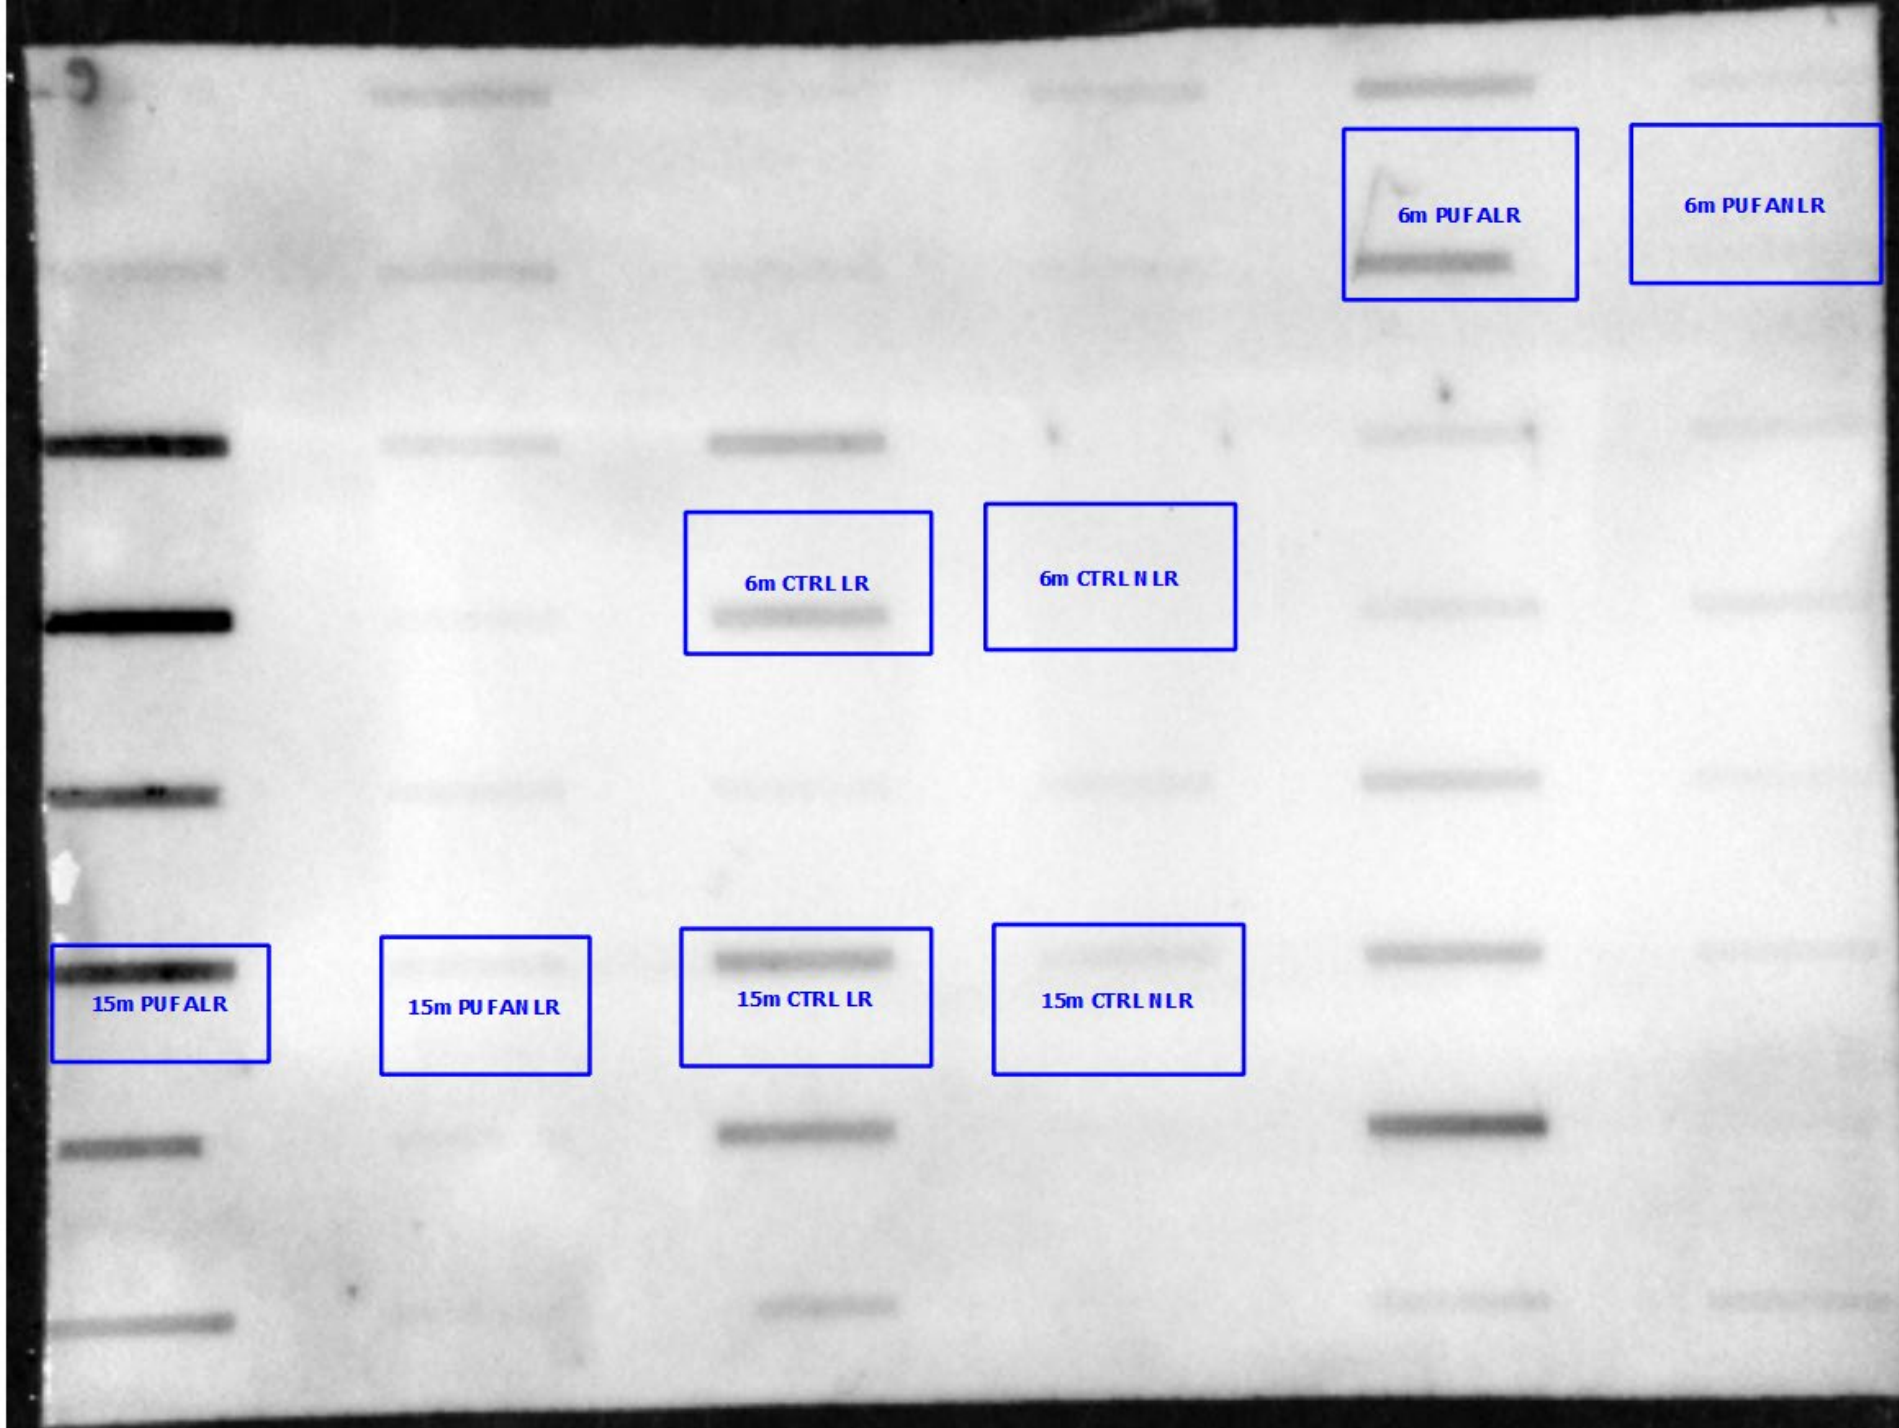



Tubulin

6 and 15 months

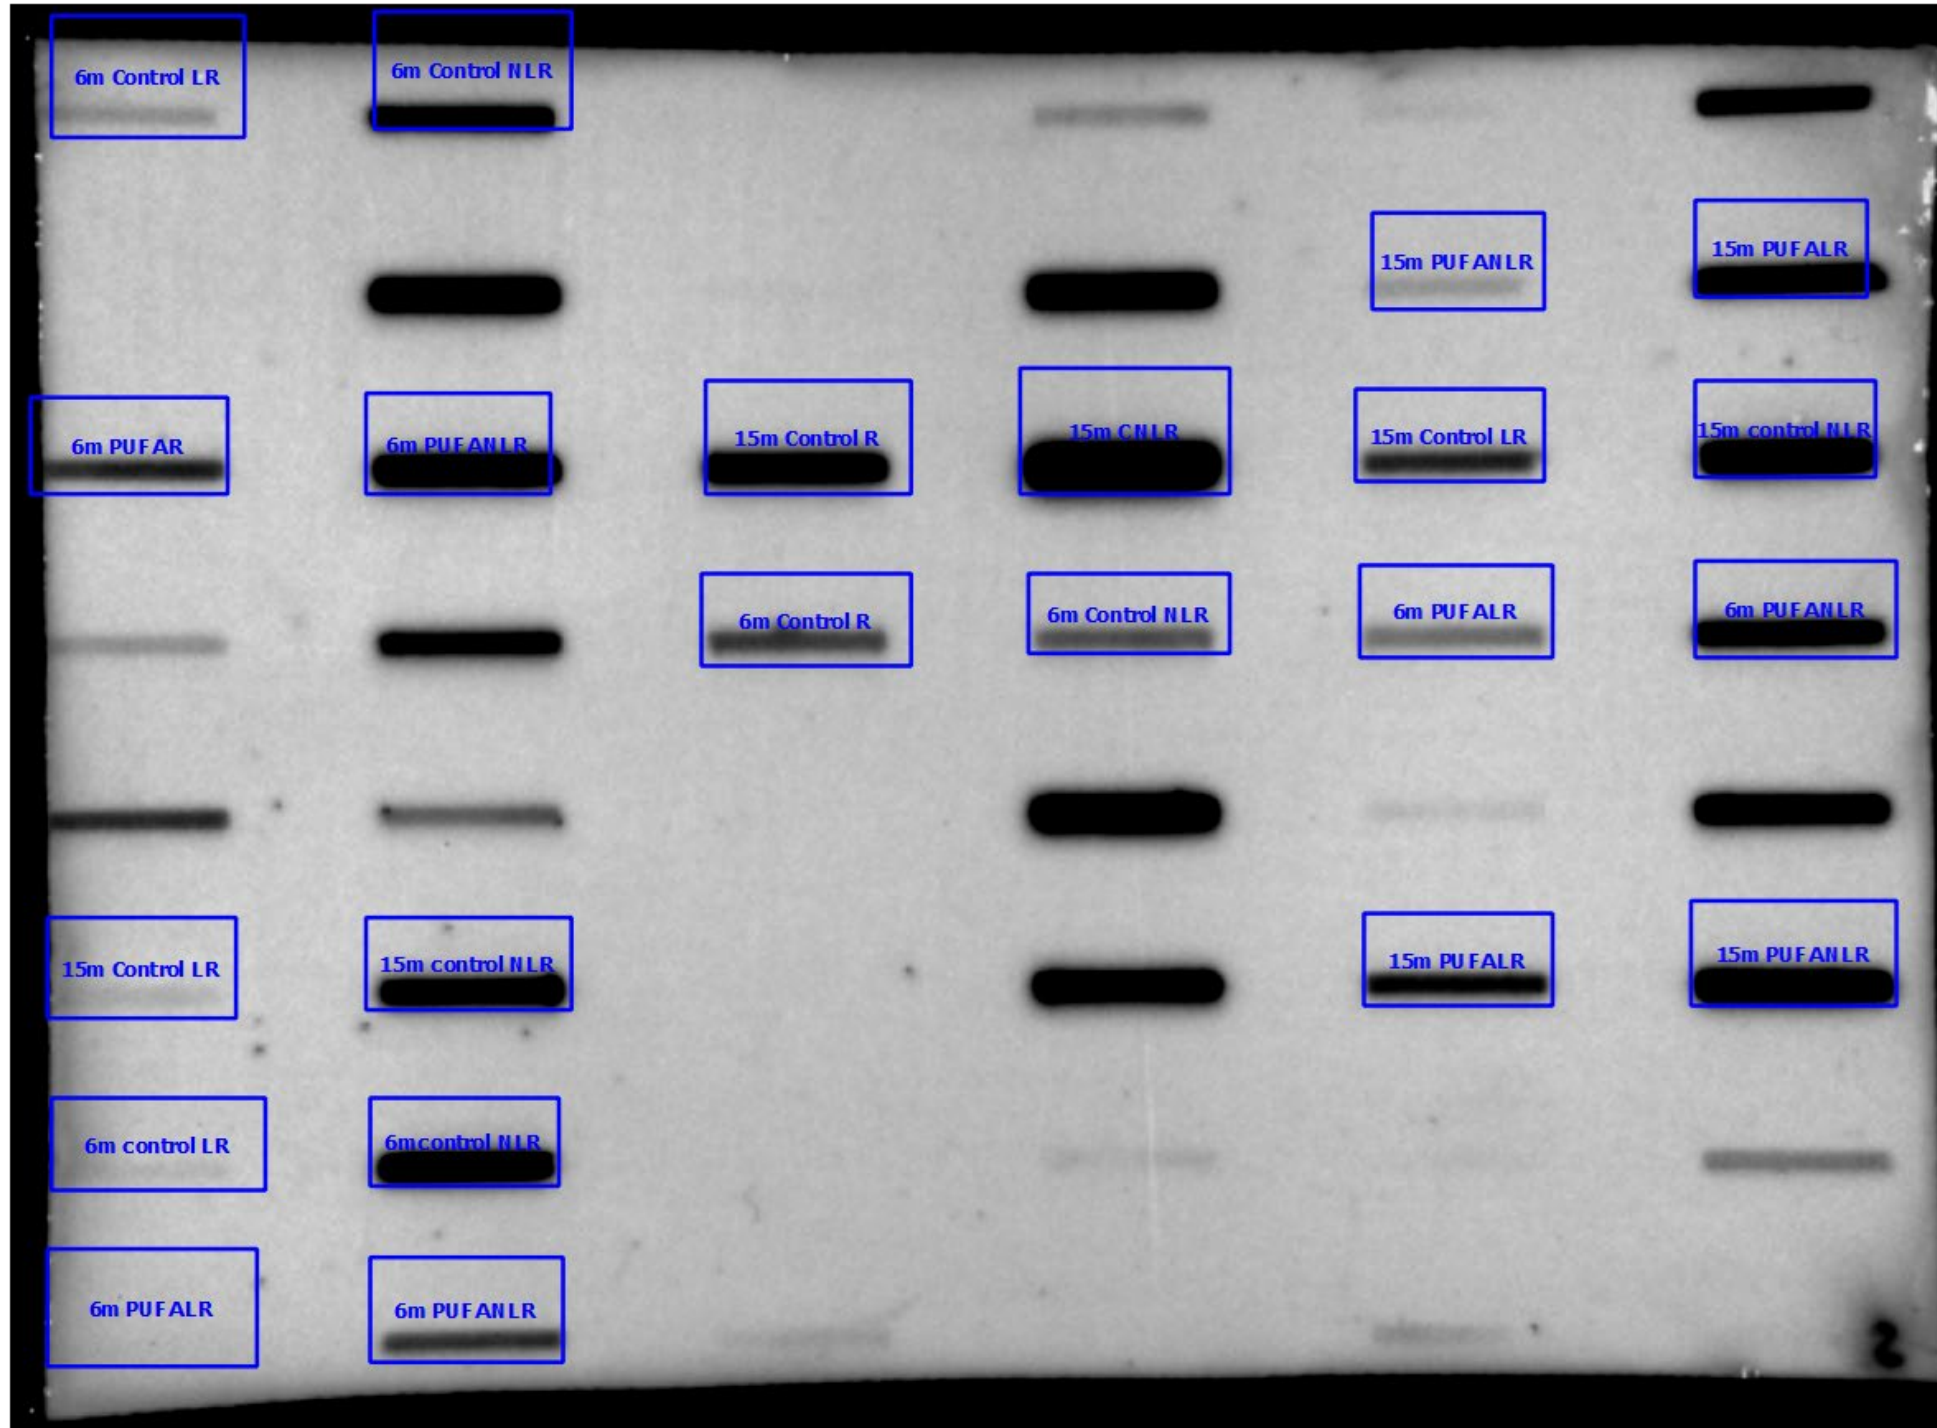

Tubulin

6 and 15 months

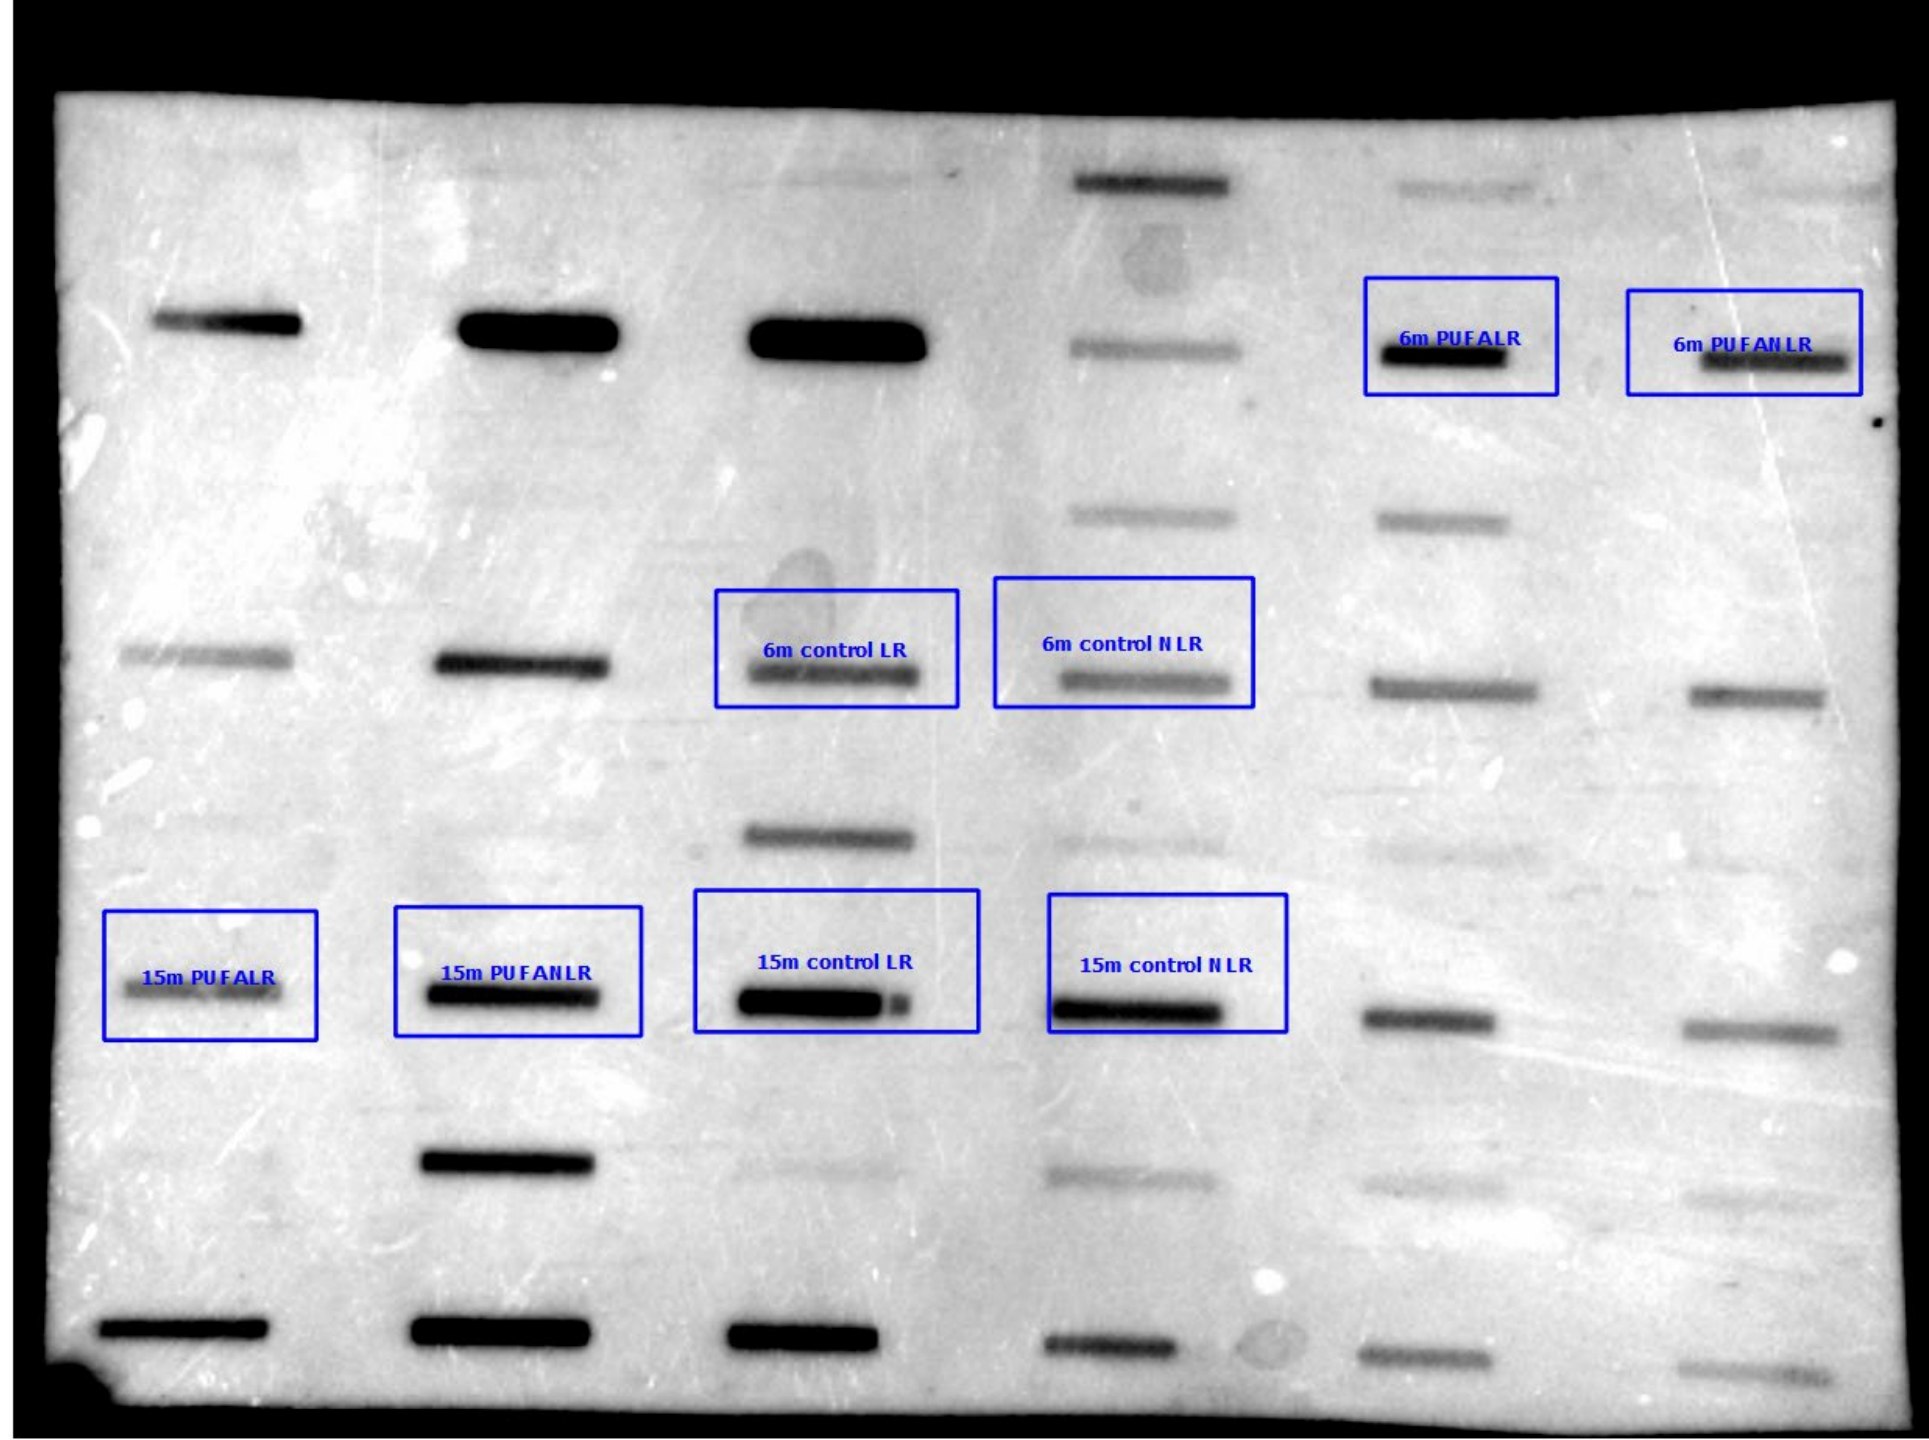



Tubulin

15 months

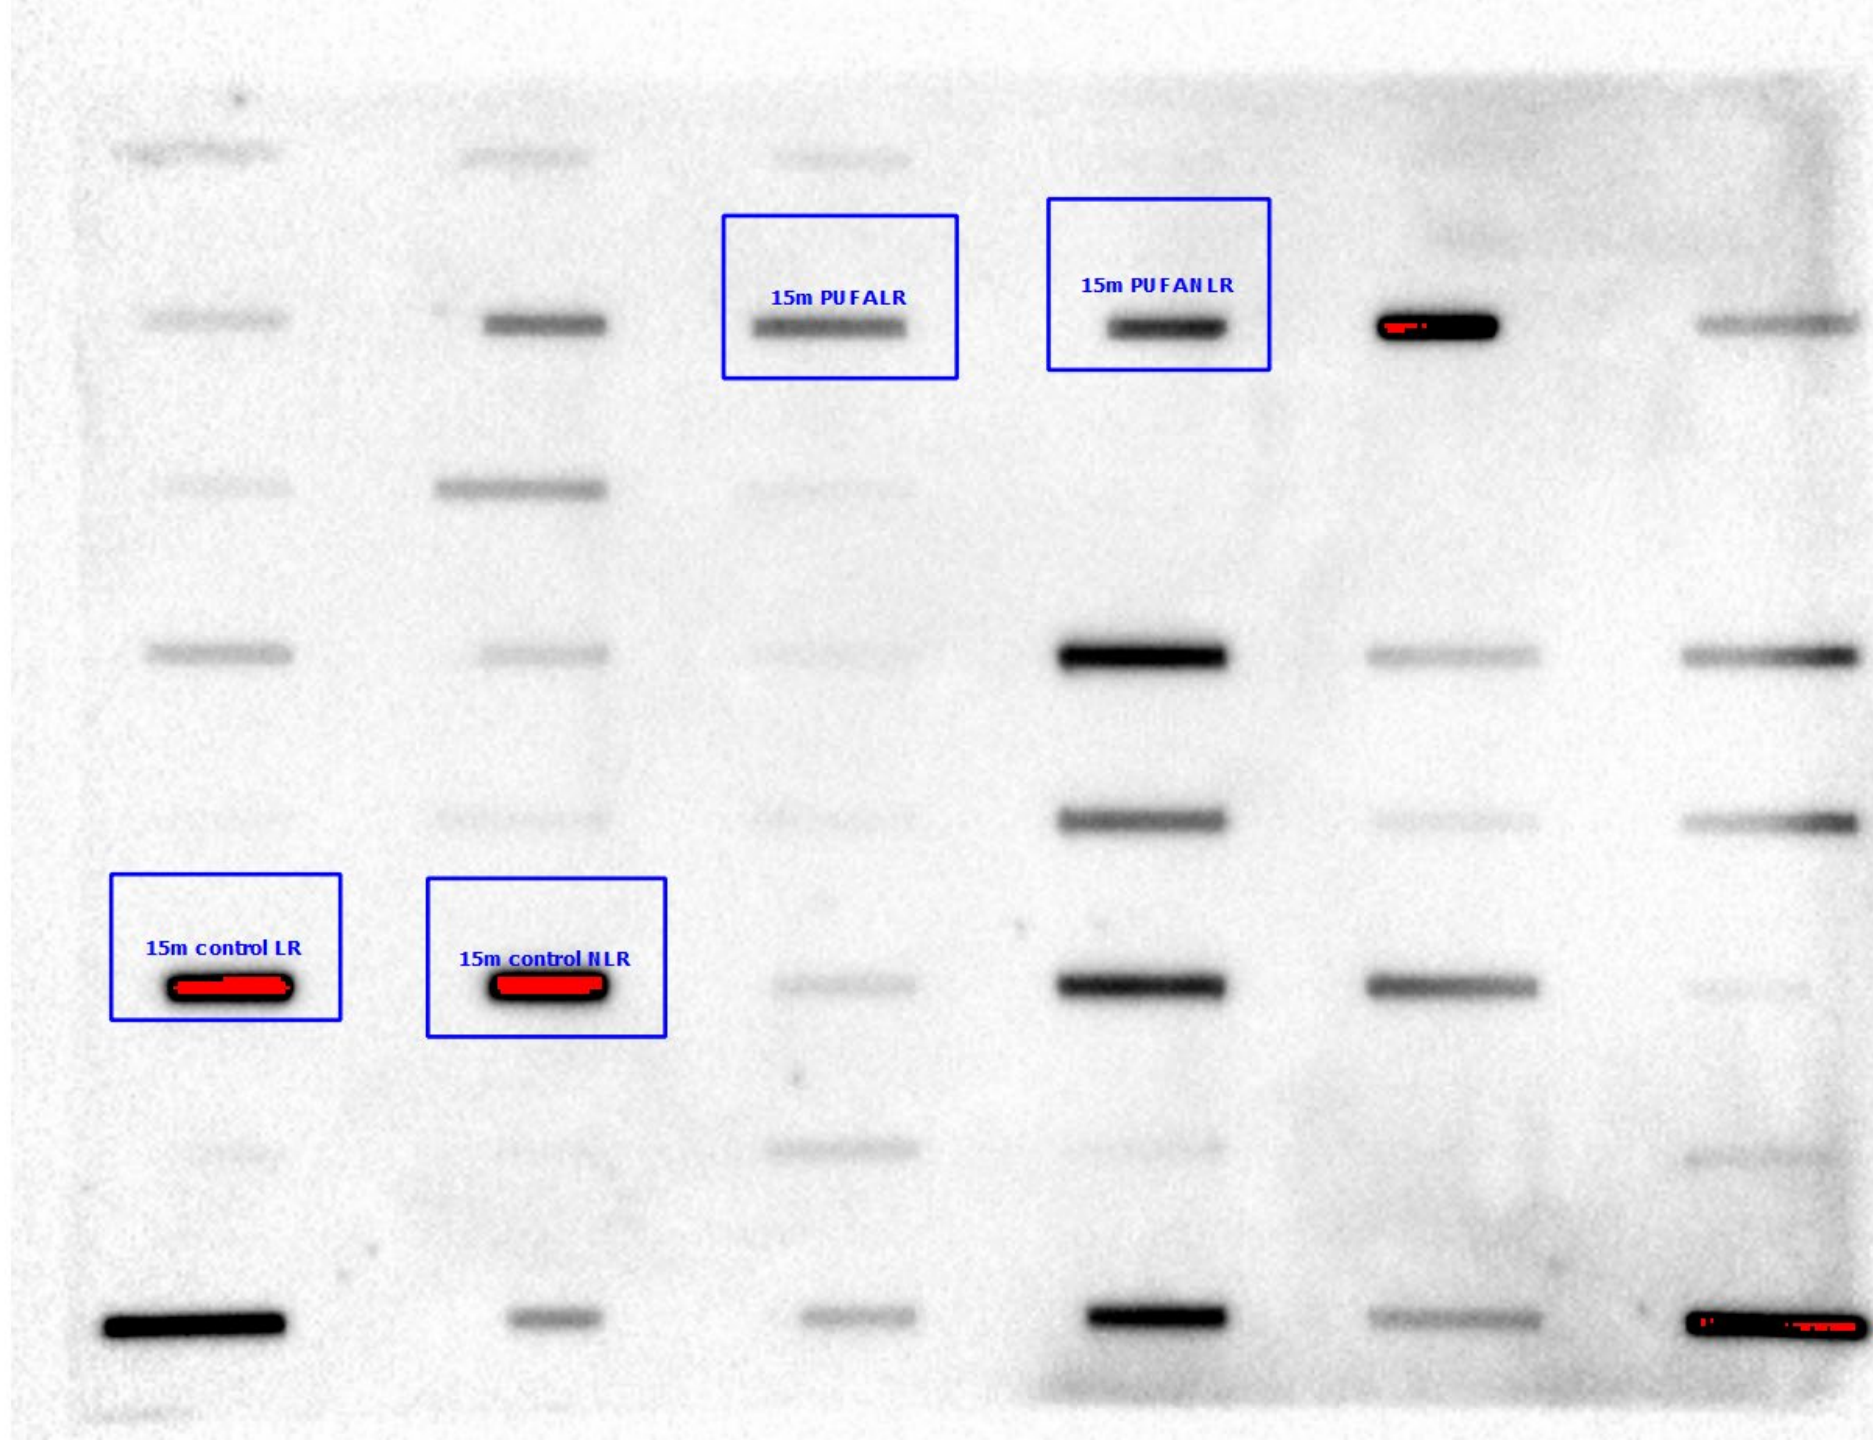

Tubulin

6 months

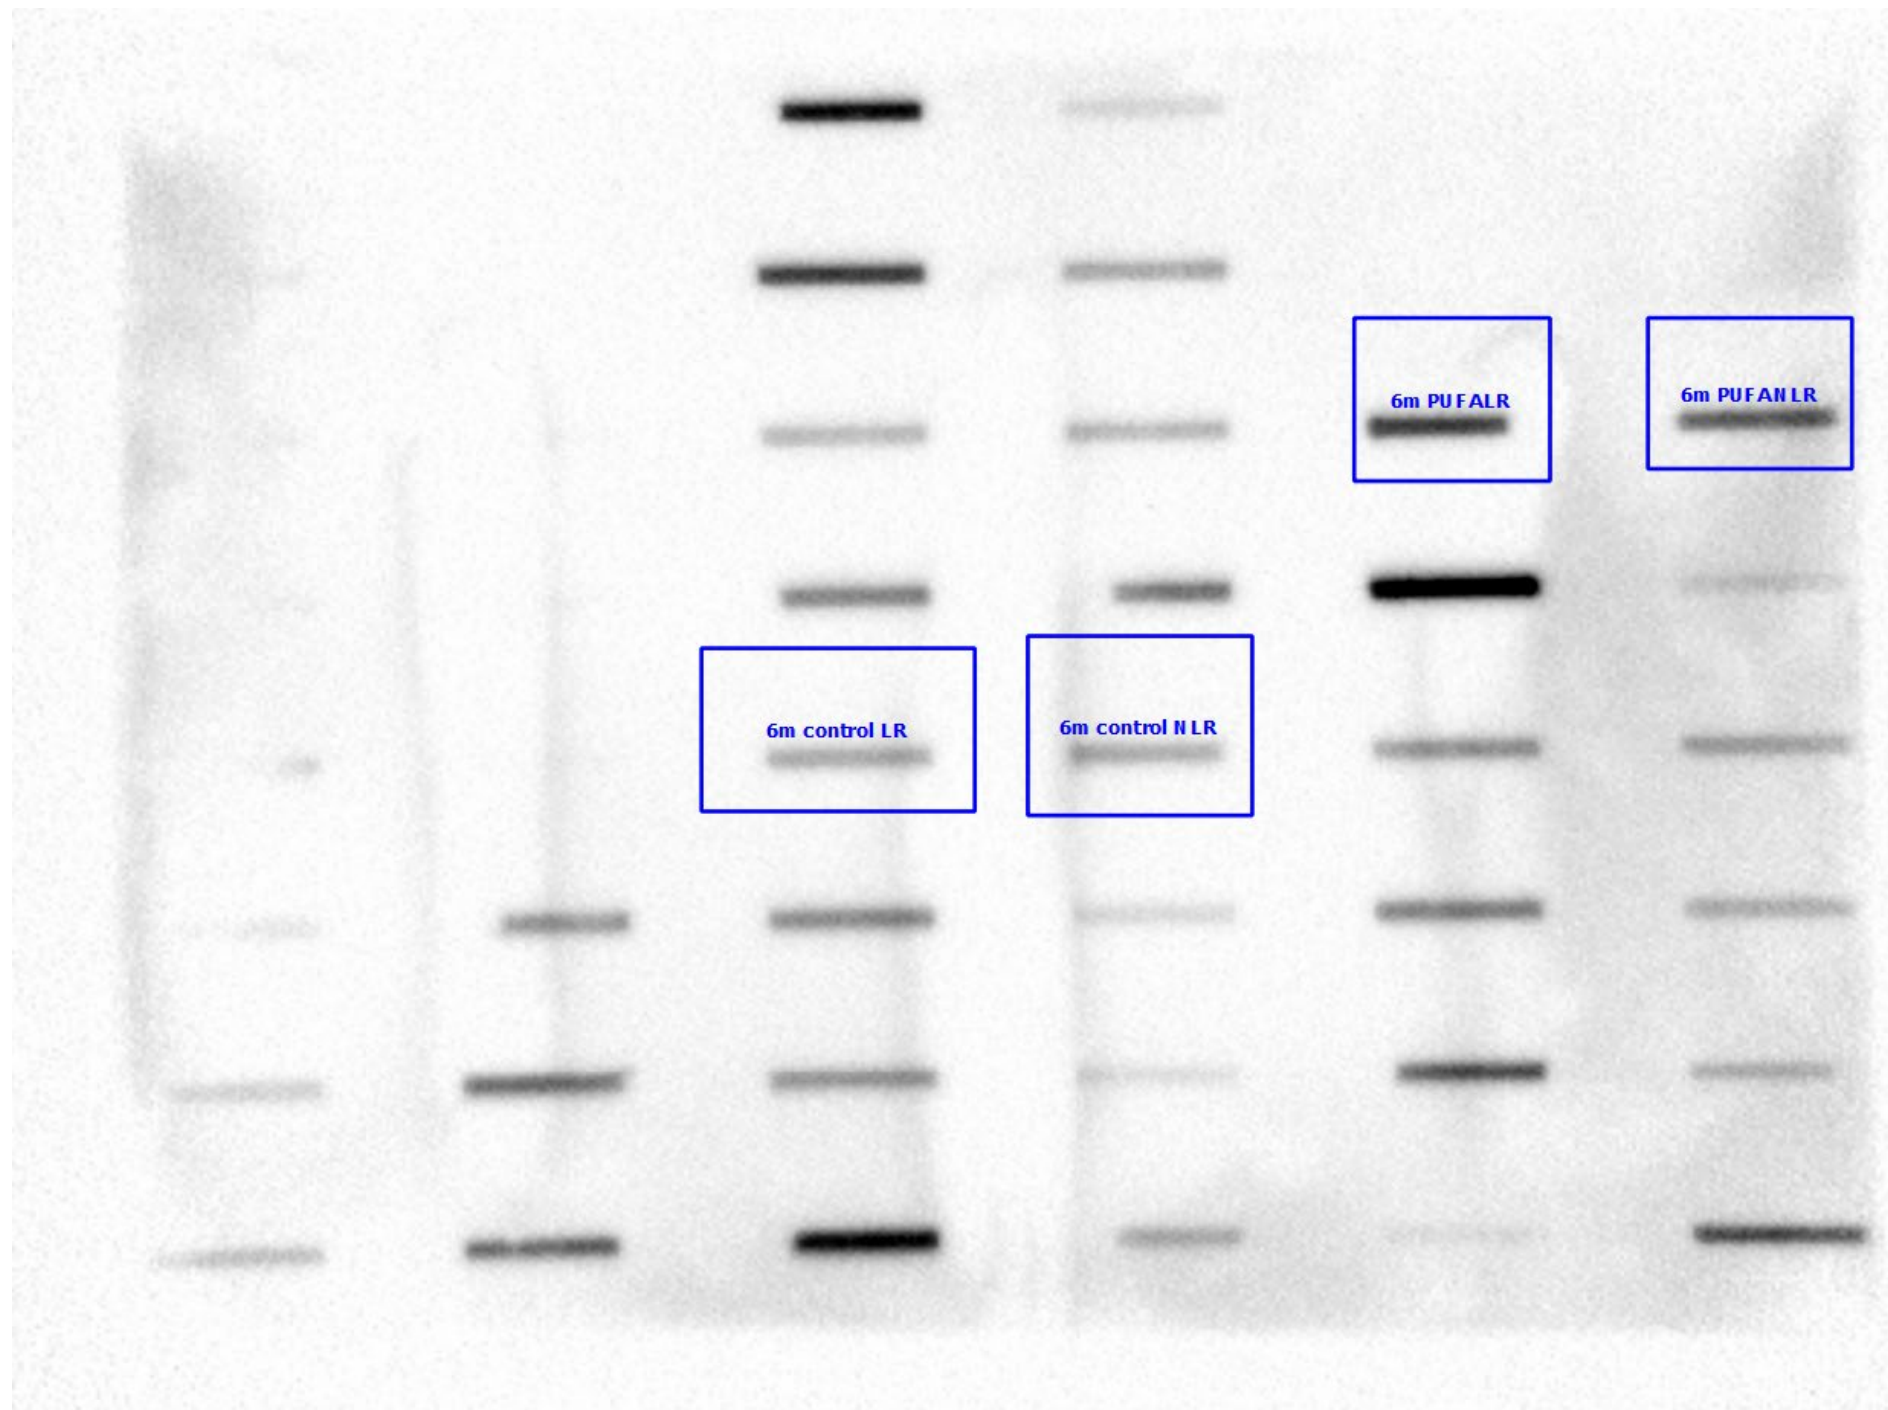

Supplement: s1 [file s1]
